# Supplementary material
Source: PubMed Central journal article supplement (PMC7680924)
Supplement: NIHMS1645360-supplement-Supplementary_file.pdf [file NIHMS1645360-supplement-Supplementary_file.pdf]

**Supplementary table 1: Frequency count (%) and test for Hardy–Weinberg equilibrium of  $\epsilon 2$  and  $\epsilon 4$  of the middle-age and elderly twins APOE genotypes**

| APOE genotypes |                        |                        |                        |                         |                        |                        | Total number | $\epsilon 2$ p-value* | $\epsilon 4$ p-value* |
|----------------|------------------------|------------------------|------------------------|-------------------------|------------------------|------------------------|--------------|-----------------------|-----------------------|
| Study          | $\epsilon 2\epsilon 2$ | $\epsilon 2\epsilon 3$ | $\epsilon 3\epsilon 3$ | $\epsilon 2 \epsilon 4$ | $\epsilon 3\epsilon 4$ | $\epsilon 4\epsilon 4$ |              |                       |                       |
| <b>Total</b>   | 15<br>(0.5 %)          | 388<br>(13.2 %)        | 1610<br>(54.8 %)       | 83<br>(2.8 %)           | 752<br>(25.6 %)        | 88<br>(3.0 %)          | 2936         | 0.16                  | 0.90                  |

\* Chi-square test for Hardy-Weinberg equilibrium  
 APOE = apolipoprotein E

1  
2  
3  
4  
5  
6  
7  
8  
9  
10  
11  
12  
13  
14  
15  
16  
17  
18  
19  
20  
21  
22  
23  
24  
25  
26  
27  
28  
29  
30  
31  
32  
33  
34  
35  
36  
37  
38  
39  
40  
41  
42  
43  
44  
45  
46  
47  
48  
49  
50  
51  
52  
53  
54  
55  
56  
57  
58  
59  
60  
61  
62  
63  
64  
65
